# Supplementary material
Source: Springer Nature journal article supplement (https://www.springermedizin.de/resource/supplementary/12968_2009_510_MOESM1_ESM.pdf/9579140)
Supplement: MOESM1 [file 9579140]

**A**

### The 40 vessel segments

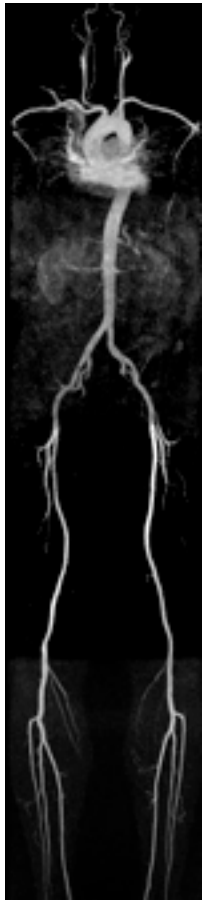

- Internal carotid arteries
- Common carotid arteries
- Vertebral arteries
  
- Subclavian arteries
- Brachiocephalic trunk
- Thoracic aorta
  
- Abdominal aorta (suprarenal)
- Celiac trunk
- Superior mesenteric artery
- Renal arteries
- Abdominal aorta (infrarenal)
- Common iliac arteries
- Internal iliac arteries
- External iliac arteries
- Common femoral arteries
- Profund femoral arteries
- Superficial femoral arteries- proximal
- Superficial femoral arteries- distal
  
- Popliteal arteries
- Anterior tibial arteries
- Tibiofibular trunks
- Peroneal arteries
- Posterior tibial arteries

**B**

### Calculation of the **Atherosclerosis Score Index**

#### 1. Assignment of scores for each vessel segment:

|                  |   |
|------------------|---|
| normal           | 1 |
| < 25% stenosis   | 2 |
| 26- 50% stenosis | 3 |
| 51- 75% stenosis | 4 |
| 76- 99% stenosis | 5 |
| Occlusion        | 6 |

#### 2. Addition of all scores

#### 3. Division of the summed vessel scores by number of analyseable segments
